# Supplementary material for: Evaluation of Tumor Grade and Proliferation Indices before and after Short-Course Anti-Inflammatory Prednisone Therapy in Canine Cutaneous Mast Cell Tumors: A Pilot Study
Source: MDPI journal article supplement (doi:10.3390/vetsci9060277), 2022-06-07
Supplement: s1 [file s1]

**Table S1.** Paired tumor grades, mitotic counts, and proliferation indices.

| Patient # | Pre-treatment |       |       |      |              | Post-treatment |       |       |      |              |
|-----------|---------------|-------|-------|------|--------------|----------------|-------|-------|------|--------------|
|           | Mitotic Count | Grade | AgNOR | Ki67 | AgNOR x Ki67 | Mitotic Count  | Grade | AgNOR | Ki67 | AgNOR x Ki67 |
| 1         | 2             | G2/LG | 1.5   | 6.6  | 9.9          | 0              | G2/LG | 1.35  | 4.4  | 5.9          |
| 2         | 0             | G2/LG | 1.61  | 4.6  | 7.4          | 1              | G2/LG | 1.63  | 5.4  | 8.8          |
| 3         | 8             | G2/HG | 2.6   | 32.4 | 84.2         | 25             | G3/HG | 2.8   | 35   | 98           |
| 4         | 2             | G2/LG | 1.47  | 11.4 | 16.8         | 1              | G2/LG | 1.64  | 1.6  | 2.6          |
| 5         | 3             | G2/LG | 3.07  | 17.2 | 52.8         | 4              | G2/LG | 2.2   | 15.8 | 34.8         |
| 6         | 2             | G2/LG | 1.13  | 1.8  | 2            | 2              | G2/LG | 1.36  | 4    | 5.4          |
| 7         | 0             | G1/LG | 1.1   | 4.4  | 4.8          | 2              | G2/LG | 1.06  | 12.6 | 13.4         |
| 8         | 1             | G2/LG | 2.8   | 5    | 14           | 2              | G2/LG | 1.4   | 2.8  | 3.9          |
| 9         | 3             | G2/LG | 1.7   | 12.6 | 21.4         | 0              | G2/LG | 1.5   | 8    | 12           |
| 10        | 1             | G2/LG | 1.97  | 8.2  | 16.2         | 0              | G2/LG | 0.93  | 2.2  | 2.1          |
| 11        | 2             | G2/LG | 1.5   | 6.8  | 10.2         | 2              | G2/LG | 1.13  | 6.4  | 7.2          |
